# Supplementary material for: A Lycopene ε-Cyclase TILLING Allele Enhances Lycopene and Carotenoid Content in Fruit and Improves Drought Stress Tolerance in Tomato Plants
Source: MDPI journal article supplement (doi:10.3390/genes14061284), 2023-06-17
Supplement: s1 [file s1]

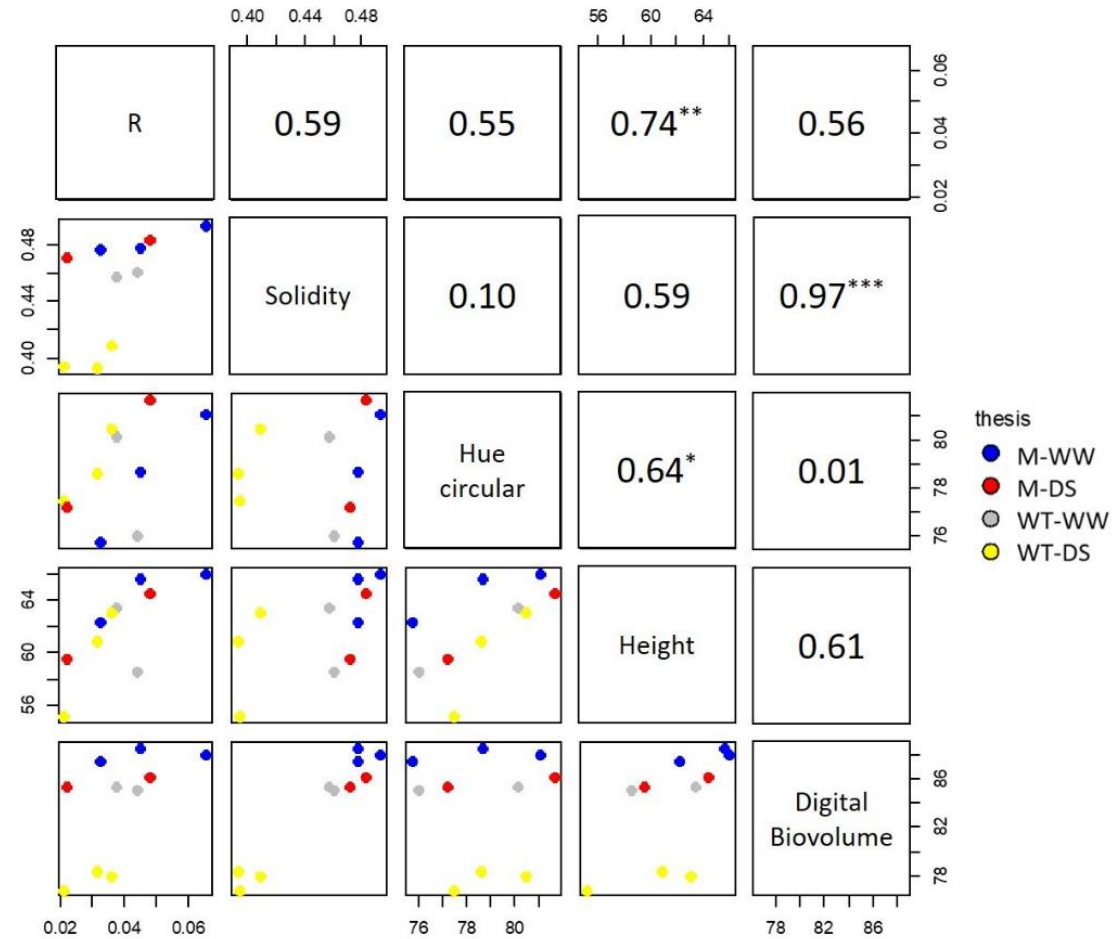

**Figure S2.** Pearson's Correlation (r) of the the bioristor response (R), and image-derived data (Solidity, Hue circular, Plant height and Digital Biovolume). Blue dots, well-watered (WW) mutant plants (M); red dots, drought stressed (DS) mutant plants (M); grey dots, well-watered (WW) wild type plants (WT); yellow dots, drought stressed (DS) wild type plants (WT). Asterisks indicate the significance levels of the correlation coefficients ( $p \leq 0.01$ , \*\*;  $p \leq 0.05$ , \*).
